# Supplementary material for: Shear-induced deformation and interfacial jamming of solid-stabilized droplets
Source: Royal Society of Chemistry journal article supplement (doi:10.1039/d0sm00374c), 2020-01-01
Supplement: d0sm00374c1.pdf [file d0sm00374c1.pdf]

Supporting Information for

**Shear-Induced Deformation and Interfacial Jamming of Solid-Stabilized Droplets**

M. Kaganyuk and A. Mohraz\*

Department of Chemical and Biomolecular Engineering, University of  
California, Irvine, CA 92697-2580, United States

Email: mohraz@uci.edu

## Table of Contents

|                                                                                             |    |
|---------------------------------------------------------------------------------------------|----|
| <b>Figure S1.</b> Scanning electron microscopy images of particles                          | S3 |
| <b>Figure S2.</b> Particle contact angle as measured by the immersed droplet method.        | S3 |
| <b>Figure S3.</b> Viscosity of the oil phase used in shear flow experiments.                | S4 |
| <b>Figure S4.</b> Estimation of particle surface-coverage in a droplet surface              | S4 |
| <b>Figure S5.</b> Non-uniform distribution of particles on a droplet under shear flow.      | S5 |
| <b>Figure S6.</b> Tip streaming in a partially coated droplet under shear flow              | S5 |
| <b>Figure S7.</b> Estimation of the relevant radii for the calculation of retraction stress | S6 |
| <b>Figure S8.</b> Droplet deformation during shear ramp-up/cessation experiments            | S6 |

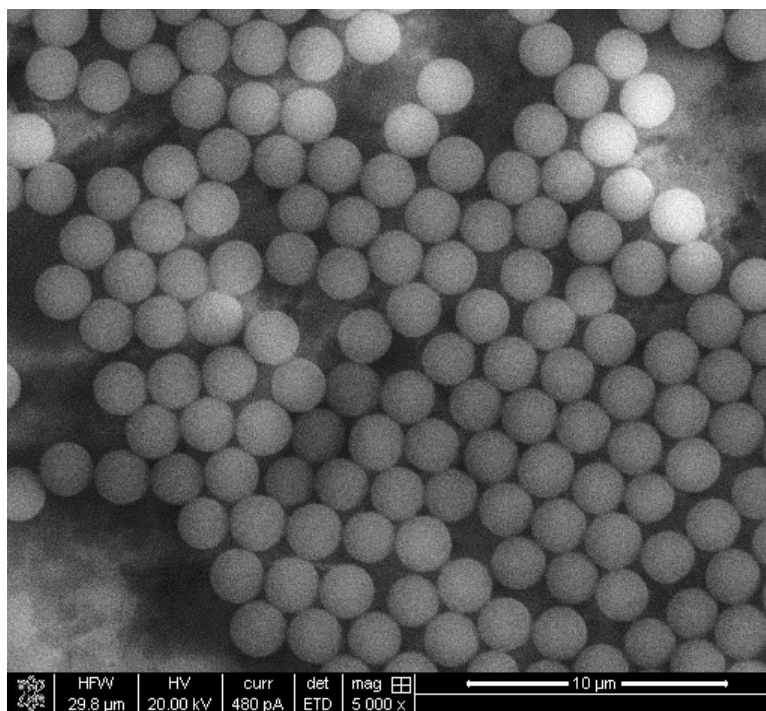

**Figure S1.** Scanning electron microscopy image of the particles utilized throughout the study. Particles were drop casted out of dodecane.

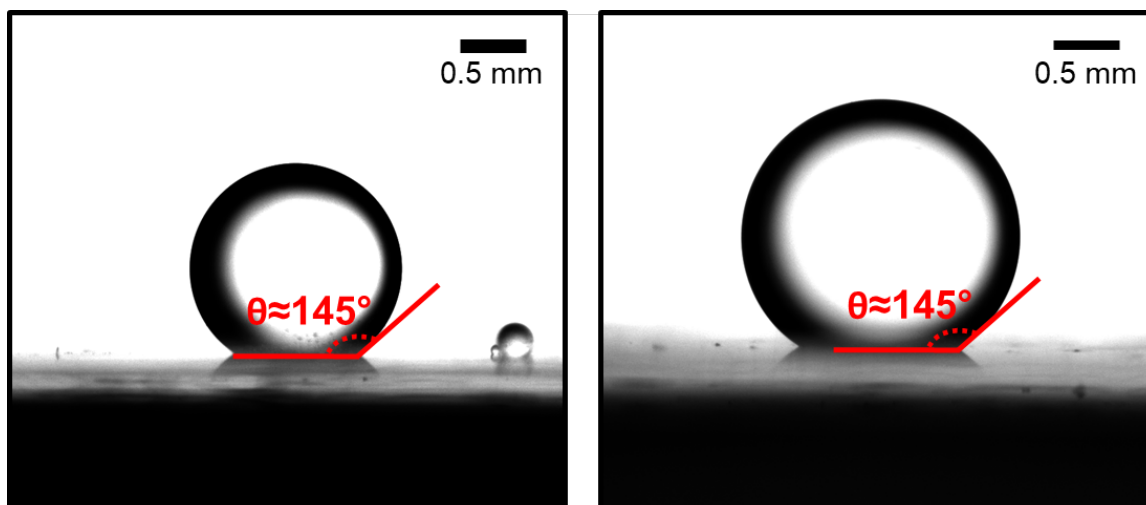

**Figure S2.** The static contact angle measured by the immersed droplet method for the particles used in the study. In this method an aqueous droplet sits on a glass coverslip, coated with particles by drop casting out of dodecane, within hexadecane (left) and a 95 wt% mixture of 10 cSt PDMS in hexadecane (right).

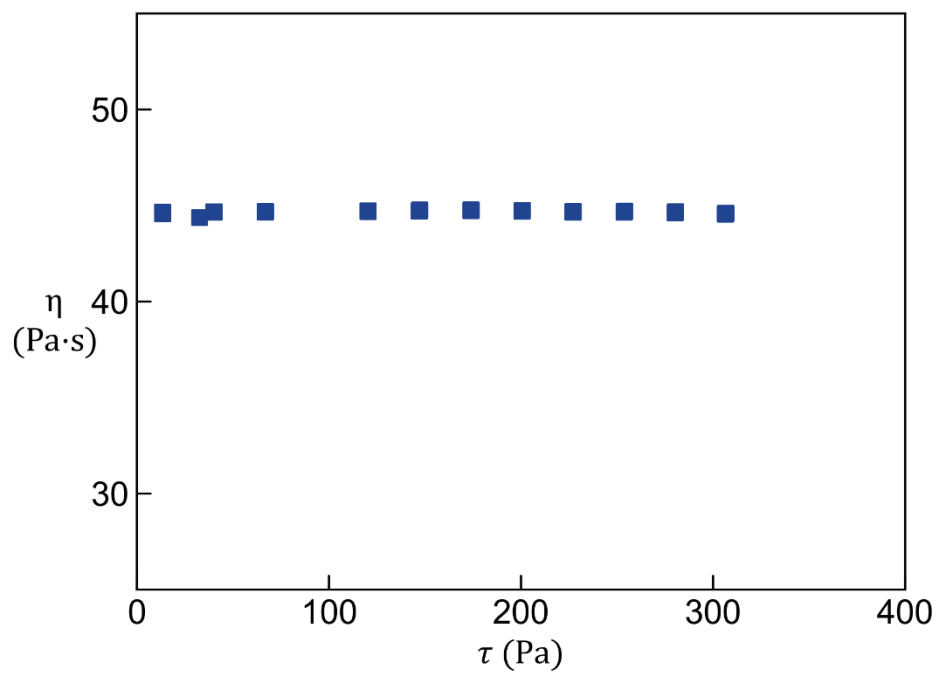

**Figure S3.** Viscosity of the continuous oil phase used in shear flow experiments measured over a range of shear stresses.

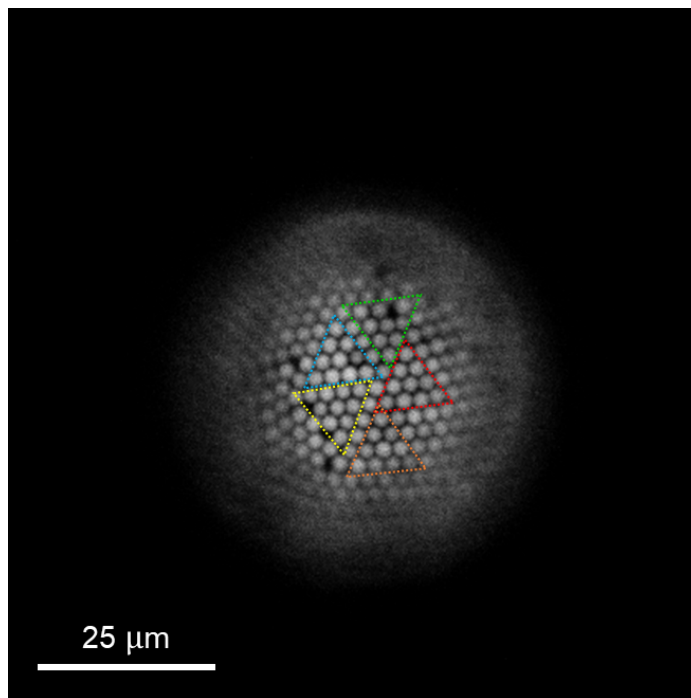

**Figure S4.** Particle surface coverage is estimated by assuming the imaged droplet interface to be flat and determining the fraction of area stabilized within each inscribed triangle.

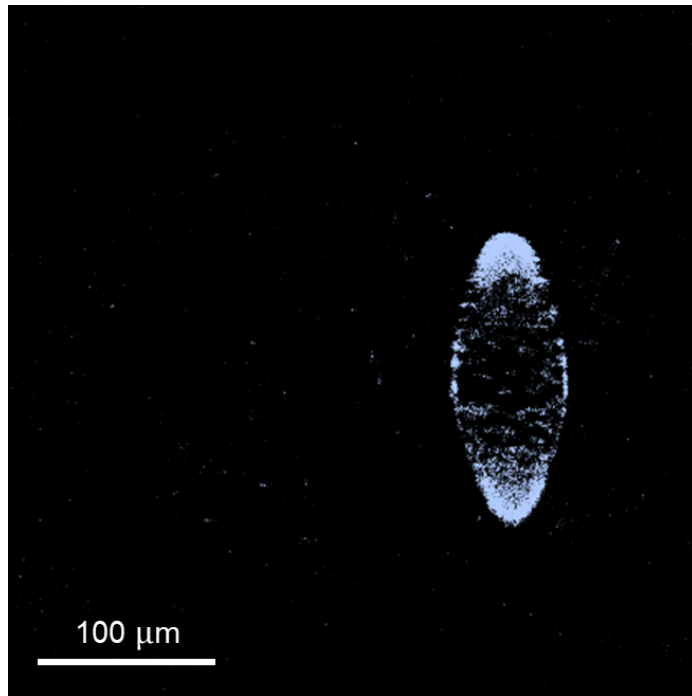

**Figure S5.** A partially-coated droplet under shear flow, illustrating the non-uniform distribution of particles on the droplet interface.

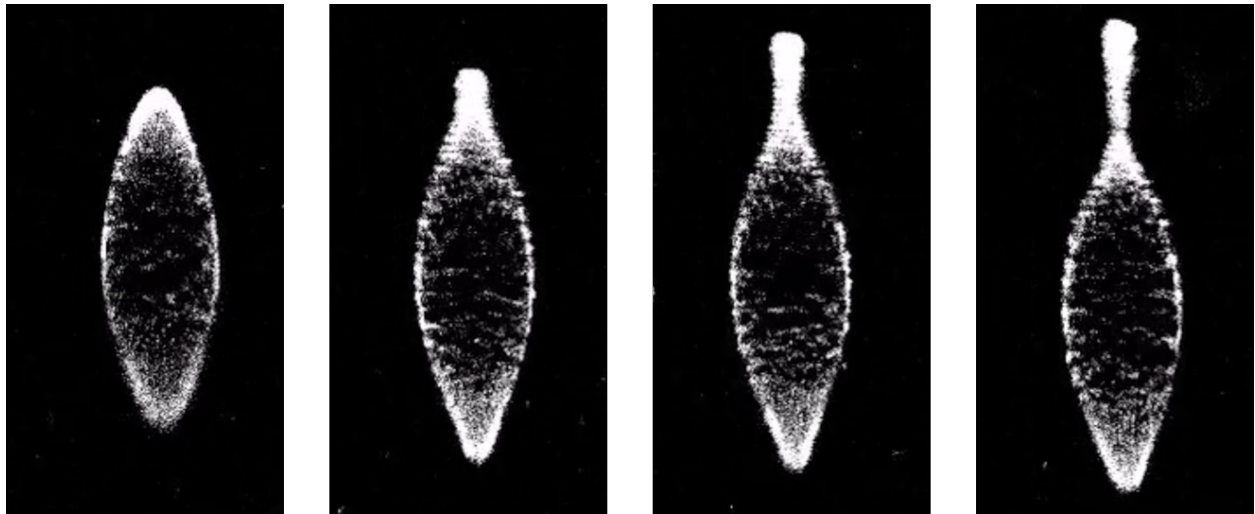

**Figure S6.** Tip streaming in a partially coated droplet under shear flow at  $Ca = 0.38$

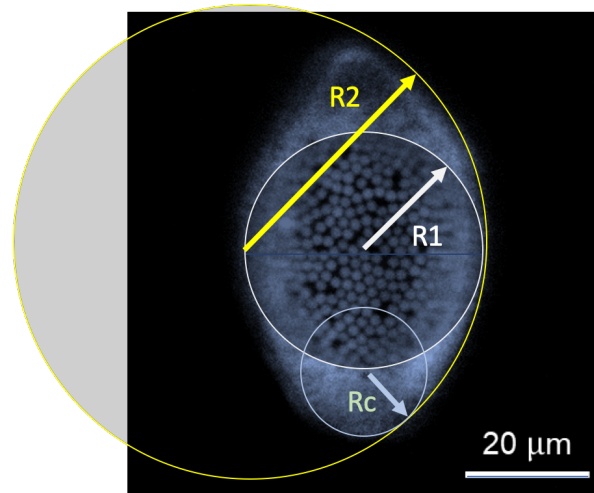

**Figure S7.** Estimation of curvatures relevant to the rudimentary analysis of the mechanics of the jammed droplet in Figure 8.

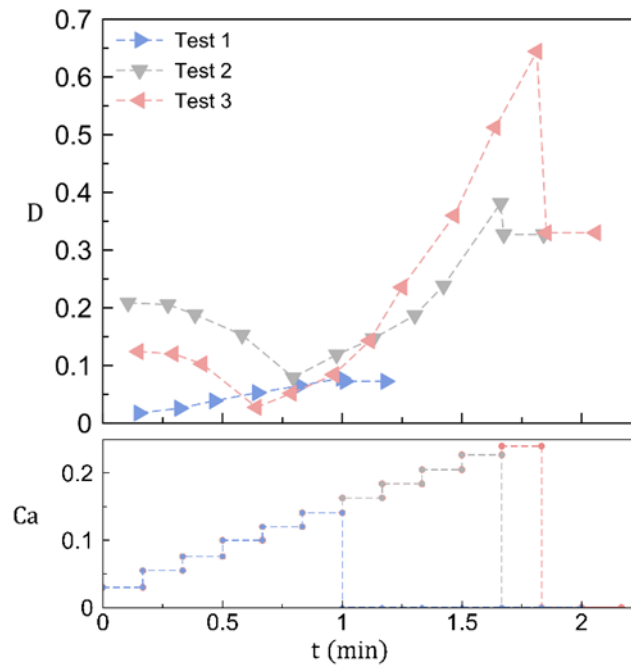

**Figure S8.** The change in droplet deformation,  $D$ , during shear ramp-up and cessation experiments (top). Each test spanned a different range of capillary numbers (bottom). All tests are done on the same droplet and though tests are labeled 1,2, 3; additional tests were run in between these tests, but not shown for brevity. The initial decrease in  $D$  in tests 2 and 3 is due to them starting with a deformed droplet caused by the cessation of shear in an earlier test. The dashed lines are drawn to guide the eye.
